# Supplementary material for: Elevated serum phosphatidylcholine (16:1/22:6) levels promoted by fish oil and vitamin D3 are highly correlated with biomarkers of non-alcoholic fatty liver disease in Chinese subjects
Source: Royal Society of Chemistry journal article supplement (doi:10.1039/d2fo02349k), 2022-01-01
Supplement: d2fo02349k1.pdf [file d2fo02349k1.pdf]

**Supplementary Table 1.** Elution gradient of mobile phase.

| Gradient time (min) | A%    | B%   | Flow velocity (mL/min) | Gradient change |
|---------------------|-------|------|------------------------|-----------------|
| 0.0                 | 5.0   | 95.0 | 0.4                    | 1300.0          |
| 3.0                 | 20.0  | 80.0 | 0.4                    | 1300.0          |
| 6.5                 | 50.0  | 50.0 | 0.4                    | 1300.0          |
| 12.5                | 85.0  | 15.0 | 0.4                    | 1300.0          |
| 17.5                | 100.0 | 0.0  | 0.4                    | 1300.0          |
| 23.3                | 100.0 | 0.0  | 0.4                    | 1300.0          |

**Supplementary Table 2.** Characteristics of the participants and serum biochemical parameters.

|                          |        | FO+D (n=23)           |                       | FO (n=27)            |                       | CO (n=24)            |                       |                       |
|--------------------------|--------|-----------------------|-----------------------|----------------------|-----------------------|----------------------|-----------------------|-----------------------|
|                          |        | Mean $\pm$ SD         | <i>P</i> <sup>a</sup> | Mean $\pm$ SD        | <i>P</i> <sup>a</sup> | Mean $\pm$ SD        | <i>P</i> <sup>a</sup> | <i>P</i> <sup>b</sup> |
| Age, y                   |        | 56.87 $\pm$ 15.29     |                       | 54.41 $\pm$ 16.72    |                       | 54.54 $\pm$ 15.38    |                       | 0.623                 |
| Female, n                |        | 12                    |                       | 11                   |                       | 12                   |                       |                       |
| BMI (kg/m <sup>2</sup> ) | Day 0  | 26.29 $\pm$ 2.33      | 0.886                 | 27.51 $\pm$ 4.29     | 0.815                 | 26.46 $\pm$ 2.36     | 0.665                 | 0.873                 |
|                          | Day 90 | 26.33 $\pm$ 2.54      |                       | 27.38 $\pm$ 3.27     |                       | 26.72 $\pm$ 2.71     |                       | 0.667                 |
|                          | Change | 0.04 $\pm$ 0.64       |                       | -0.13 $\pm$ 1.96     |                       | 0.25 $\pm$ 0.82      |                       | 0.581                 |
| Dietary intakes          |        |                       |                       |                      |                       |                      |                       |                       |
| Energy (kcal)            | Day 0  | 1924.99 $\pm$ 580.83  | 0.152                 | 2649.16 $\pm$ 796.03 | 0.361                 | 2040.75 $\pm$ 583.58 | 0.252                 | 0.863                 |
|                          | Day 90 | 2546.03 $\pm$ 1222.61 |                       | 2475.50 $\pm$ 829.21 |                       | 2275.93 $\pm$ 714.69 |                       | 0.380                 |
|                          | Change | 621.04 $\pm$ 982.41   |                       | -173.66 $\pm$ 984.77 |                       | 235.18 $\pm$ 659.04  |                       | 0.307                 |
| Carbohydrate (g/d)       | Day 0  | 221.81 $\pm$ 54.30    | 0.330                 | 332.11 $\pm$ 113.23  | 0.071                 | 248.26 $\pm$ 90.73   | 0.715                 | 0.647                 |
|                          | Day 90 | 294.49 $\pm$ 155.44   |                       | 267.45 $\pm$ 79.41   |                       | 271.91 $\pm$ 118.65  |                       | 0.614                 |
|                          | Change | 72.68 $\pm$ 155.16    |                       | -64.66 $\pm$ 110.23  |                       | 23.65 $\pm$ 124.04   |                       | 0.444                 |
| Lipid (g/d)              | Day 0  | 82.81 $\pm$ 36.70     | 0.206                 | 101.02 $\pm$ 34.13   | 0.744                 | 80.90 $\pm$ 25.87    | 0.990                 | 0.725                 |
|                          | Day 90 | 106.49 $\pm$ 62.78    |                       | 111.83 $\pm$ 55.76   |                       | 94.80 $\pm$ 36.84    |                       | 0.467                 |
|                          | Change | 23.68 $\pm$ 37.61     |                       | 10.81 $\pm$ 59.15    |                       | 13.90 $\pm$ 36.95    |                       | 0.569                 |
| Protein (g/d)            | Day 0  | 73.12 $\pm$ 31.55     | 0.300                 | 100.54 $\pm$ 43.94   | 0.823                 | 79.26 $\pm$ 24.22    | 0.105                 | 0.774                 |
|                          | Day 90 | 102.42 $\pm$ 69.36    |                       | 99.82 $\pm$ 52.38    |                       | 81.36 $\pm$ 26.85    |                       | 0.205                 |
|                          | Change | 29.30 $\pm$ 62.31     |                       | -0.71 $\pm$ 42.73    |                       | 2.10 $\pm$ 28.46     |                       | 0.103                 |
| Cholesterol (mg/d)       | Day 0  | 195.91 $\pm$ 143.41   | 0.387                 | 193.94 $\pm$ 152.06  | 0.611                 | 192.72 $\pm$ 93.46   | 0.167                 | 0.956                 |
|                          | Day 90 | 156.84 $\pm$ 136.73   |                       | 161.49 $\pm$ 130.50  |                       | 156.79 $\pm$ 133.02  |                       | 0.995                 |
|                          | Change | -38.03 $\pm$ 106.51   |                       | -32.44 $\pm$ 104.59  |                       | -35.93 $\pm$ 142.22  |                       | 0.960                 |
| Saturated lipids (g/d)   | Day 0  | 19.38 $\pm$ 7.22      | 0.668                 | 22.42 $\pm$ 10.31    | 0.685                 | 22.19 $\pm$ 6.75     | 0.612                 | 0.240                 |
|                          | Day 90 | 21.15 $\pm$ 9.48      |                       | 23.74 $\pm$ 10.72    |                       | 22.66 $\pm$ 9.72     |                       | 0.622                 |
|                          | Change | 1.78 $\pm$ 10.40      |                       | 1.03 $\pm$ 12.21     |                       | 0.46 $\pm$ 11.02     |                       | 0.682                 |
| Blood biomarkers         |        |                       |                       |                      |                       |                      |                       |                       |
| ALT (U/L)                | Day 0  | 26.91 $\pm$ 13.42     | 0.113                 | 31.59 $\pm$ 29.27    | 0.182                 | 28.63 $\pm$ 27.11    | 0.577                 | 0.821                 |
|                          | Day 90 | 20.30 $\pm$ 7.79      |                       | 26.15 $\pm$ 19.12    |                       | 28.29 $\pm$ 27.03    |                       | 0.173                 |
|                          | Change | -6.61 $\pm$ 10.14     |                       | -5.44 $\pm$ 19.20    |                       | -0.33 $\pm$ 0.26     |                       | 0.047                 |
| AST (U/L)                | Day 0  | 22.87 $\pm$ 7.55      | 0.243                 | 26.67 $\pm$ 8.70     | 0.615                 | 21.42 $\pm$ 5.35     | 0.885                 | 0.546                 |
|                          | Day 90 | 19.78 $\pm$ 3.89      |                       | 22.41 $\pm$ 6.69     |                       | 22.04 $\pm$ 8.92     |                       | 0.272                 |
|                          | Change | -3.09 $\pm$ 5.93      |                       | -1.26 $\pm$ 4.96     |                       | 0.63 $\pm$ 3.49      |                       | 0.010                 |
| GGT (U/L)                | Day 0  | 34.52 $\pm$ 34.51     | 0.222                 | 31.44 $\pm$ 24.77    | 0.917                 | 28.92 $\pm$ 18.68    | 0.828                 | 0.476                 |
|                          | Day 90 | 23.26 $\pm$ 20.26     |                       | 25.48 $\pm$ 12.36    |                       | 29.58 $\pm$ 22.94    |                       | 0.183                 |
|                          | Change | -11.26 $\pm$ 32.45    |                       | -5.96 $\pm$ 18.57    |                       | 0.67 $\pm$ 8.17      |                       | 0.064                 |
| Glucose (mmol/L)         | Day 0  | 6.38 $\pm$ 1.99       | 0.583                 | 5.71 $\pm$ 1.16      | 0.076                 | 6.01 $\pm$ 1.21      | 0.327                 | 0.417                 |
|                          | Day 90 | 6.47 $\pm$ 1.93       |                       | 6.09 $\pm$ 1.20      |                       | 6.20 $\pm$ 0.94      |                       | 0.518                 |
|                          | Change | 0.09 $\pm$ 0.58       |                       | 0.38 $\pm$ 0.36      |                       | 0.19 $\pm$ 0.71      |                       | 0.588                 |
| TAG (mmol/L)             | Day 0  | 1.71 $\pm$ 0.76       | 0.050                 | 2.55 $\pm$ 1.55      | 0.095                 | 1.76 $\pm$ 0.73      | 0.452                 | 0.917                 |
|                          | Day 90 | 1.36 $\pm$ 0.70       |                       | 1.76 $\pm$ 0.62      |                       | 1.87 $\pm$ 1.40      |                       | 0.074                 |
|                          | Change | -0.35 $\pm$ 0.84      |                       | -0.78 $\pm$ 1.12     |                       | 0.11 $\pm$ 1.02      |                       | 0.128                 |
| TC (mmol/L)              | Day 0  | 5.32 $\pm$ 1.14       | 0.583                 | 4.83 $\pm$ 1.03      | 0.729                 | 5.02 $\pm$ 0.96      | 0.386                 | 0.338                 |
|                          | Day 90 | 5.26 $\pm$ 1.19       |                       | 4.79 $\pm$ 1.14      |                       | 5.22 $\pm$ 0.80      |                       | 0.915                 |
|                          | Change | -0.07 $\pm$ 0.96      |                       | -0.04 $\pm$ 0.91     |                       | 0.20 $\pm$ 0.62      |                       | 0.287                 |
| HDL-C (mmol/L)           | Day 0  | 1.24 $\pm$ 0.26       | 0.312                 | 1.03 $\pm$ 0.24      | 0.616                 | 1.18 $\pm$ 0.36      | 0.726                 | 0.515                 |
|                          | Day 90 | 1.30 $\pm$ 0.28       |                       | 1.06 $\pm$ 0.25      |                       | 1.23 $\pm$ 0.39      |                       | 0.479                 |
|                          | Change | 0.05 $\pm$ 0.11       |                       | 0.03 $\pm$ 0.14      |                       | 0.04 $\pm$ 0.18      |                       | 0.828                 |
| LDL-C (mmol/L)           | Day 0  | 3.64 $\pm$ 1.05       | 0.583                 | 2.96 $\pm$ 0.99      | 0.616                 | 3.31 $\pm$ 0.84      | 0.523                 | 0.267                 |
|                          | Day 90 | 3.61 $\pm$ 1.10       |                       | 3.13 $\pm$ 1.14      |                       | 3.48 $\pm$ 0.73      |                       | 0.685                 |
|                          | Change | -0.03 $\pm$ 0.66      |                       | 0.17 $\pm$ 0.98      |                       | 0.17 $\pm$ 0.72      |                       | 0.395                 |
| Insulin (pmol/L)         | Day 0  | 13.21 $\pm$ 2.86      | 0.021                 | 13.56 $\pm$ 1.93     | 0.012                 | 13.50 $\pm$ 2.35     | 0.364                 | 0.692                 |
|                          | Day 90 | 11.60 $\pm$ 1.56      |                       | 12.50 $\pm$ 2.38     |                       | 12.87 $\pm$ 2.13     |                       | 0.040                 |
|                          | Change | -1.61 $\pm$ 1.99      |                       | -1.06 $\pm$ 2.27     |                       | -0.63 $\pm$ 1.52     |                       | 0.091                 |
| HOMA-IR                  | Day 0  | 3.71 $\pm$ 1.22       | 0.410                 | 3.48 $\pm$ 0.13      | 0.952                 | 3.59 $\pm$ 0.82      | 0.869                 | 0.685                 |
|                          | Day 90 | 3.37 $\pm$ 1.10       |                       | 3.55 $\pm$ 1.07      |                       | 3.59 $\pm$ 0.75      |                       | 0.463                 |
|                          | Change | -0.34 $\pm$ 0.71      |                       | 0.07 $\pm$ 0.97      |                       | -0.00 $\pm$ 0.53     |                       | 0.142                 |

Serum inflammatory biomarkers

|                         |        |                      |       |                      |       |                     |       |         |
|-------------------------|--------|----------------------|-------|----------------------|-------|---------------------|-------|---------|
| IL-1 $\beta$<br>(ng/L)  | Day 0  | 22.98 $\pm$ 32.16    | 0.379 | 29.21 $\pm$ 29.43    | 0.164 | 23.36 $\pm$ 23.88   | 0.194 | 0.984   |
|                         | Day 90 | 20.62 $\pm$ 26.78    |       | 24.56 $\pm$ 34.00    |       | 20.23 $\pm$ 26.47   |       | 0.954   |
|                         | Change | -6.85 $\pm$ 7.28     |       | -3.65 $\pm$ 7.51     |       | 1.06 $\pm$ 5.71     |       | < 0.001 |
| IL-6<br>(ng/L)          | Day 0  | 8.97 $\pm$ 11.13     | 0.750 | 7.56 $\pm$ 9.92      | 0.029 | 6.99 $\pm$ 8.45     | 0.224 | 0.499   |
|                         | Day 90 | 8.54 $\pm$ 10.60     |       | 8.48 $\pm$ 8.66      |       | 7.98 $\pm$ 7.96     |       | 0.835   |
|                         | Change | -0.43 $\pm$ 1.93     |       | 0.92 $\pm$ 2.33      |       | 1.00 $\pm$ 2.88     |       | 0.049   |
| TNF- $\alpha$<br>(pg/L) | Day 0  | 435.03 $\pm$ 380.53  | 0.009 | 422.95 $\pm$ 468.96  | 0.004 | 390.80 $\pm$ 312.57 | 0.003 | 0.705   |
|                         | Day 90 | 259.09 $\pm$ 420.66  |       | 294.26 $\pm$ 439.84  |       | 243.25 $\pm$ 300.67 |       | 0.887   |
|                         | Change | -167.24 $\pm$ 102.11 |       | -106.47 $\pm$ 150.90 |       | -22.56 $\pm$ 90.62  |       | < 0.001 |

$P^a$  is for the differences between the baseline and endpoint of intervention by a paired Wilcoxon rank sum test.  $P^b$  is for the differences between three groups by a generalized linear model. Abbreviations: ALT, alanine transaminase; AST, aspartate aminotransferase; BMI, body mass index; GGT, gamma-glutamyl transpeptidase; HDL-C, high-density lipoprotein cholesterol; HOMA-IR, homeostasis model assessment of insulin resistance; IL-1 $\beta$ , interleukin-1 $\beta$ ; IL-6, interleukin-6; LDL-C, low-density lipoprotein cholesterol; TAG, triacylglycerol; TC, total cholesterol; TNF- $\alpha$ , tumor necrosis factor- $\alpha$ .

**Supplementary Table 3.** Summary of parameters from OPLS-DA models for discriminating serum metabolite profiling before and after intervention

| Group | $R^2Y$ | $Q^2Y$ |
|-------|--------|--------|
| FO+D  | 0.948  | 0.720  |
| FO    | 0.974  | 0.847  |
| CO    | 0.960  | 0.634  |

**Supplementary Table 4.** Metabolites changed significantly between day 90 and day 0 in FO+D group.

| Metabolite                                                                                   | Retention time (rt, min) | Experimental $m/z$ ([M+H] <sup>+</sup> ) | Calculated $m/z$ | Molecular Formula                                                              | VIP scores | Fold change |
|----------------------------------------------------------------------------------------------|--------------------------|------------------------------------------|------------------|--------------------------------------------------------------------------------|------------|-------------|
| (5R,6Z,8E,10E,14Z)-5,20,20-trihydroxy-12-oxoicosa-6,8,10,14-tetraenoic acid                  | 0.603                    | 367.1903                                 | 366.2042         | C <sub>20</sub> H <sub>30</sub> O <sub>6</sub>                                 | 2.51       | 0.37        |
| Zucchini factor B                                                                            | 4.331                    | 664.3977                                 | 663.4288         | C <sub>44</sub> H <sub>57</sub> NO <sub>4</sub>                                | 2.39       | 0.36        |
| 9-[(3,7-Dimethyl-2,6-octadienyl)oxy]-7H-furo[3,2-g]benzopyran-7                              | 4.473                    | 339.1580                                 | 338.1518         | C <sub>21</sub> H <sub>22</sub> O <sub>4</sub>                                 | 2.55       | 0.36        |
| Oxidized phosphatidylglycerol (prostaglandin J2/i-12:0)                                      | 4.689                    | 745.3942                                 | 744.4214         | C <sub>38</sub> H <sub>65</sub> O <sub>12</sub> P                              | 3.60       | 3.49        |
| N-Eicosapentaenoyl Phenylalanine                                                             | 4.819                    | 450.2568                                 | 449.2930         | C <sub>29</sub> H <sub>39</sub> NO <sub>3</sub>                                | 3.33       | 0.36        |
| Estrone glucuronide                                                                          | 4.941                    | 447.2189                                 | 446.1941         | C <sub>24</sub> H <sub>30</sub> O <sub>8</sub>                                 | 3.11       | 3.24        |
| 1-Hydroxyrutacridone epoxide                                                                 | 5.426                    | 340.1188                                 | 339.1107         | C <sub>19</sub> H <sub>17</sub> NO <sub>5</sub>                                | 2.22       | 0.44        |
| p-Hydroxyphenylethylbiguanide                                                                | 5.799                    | 222.1369                                 | 221.1277         | C <sub>10</sub> H <sub>15</sub> N <sub>5</sub> O                               | 3.54       | 0.26        |
| Homocholic acid                                                                              | 6.916                    | 423.3501                                 | 422.3032         | C <sub>25</sub> H <sub>42</sub> O <sub>5</sub>                                 | 8.16       | 4.96        |
| 3b-Hydroxy-17-(1h-1,2,3-triazol-1-yl)androsta-5,16-diene                                     | 6.987                    | 340.2418                                 | 339.2311         | C <sub>21</sub> H <sub>29</sub> N <sub>3</sub> O                               | 3.79       | 0.42        |
| Cholylhistidine                                                                              | 10.085                   | 546.3325                                 | 545.3465         | C <sub>30</sub> H <sub>47</sub> N <sub>3</sub> O <sub>6</sub>                  | 2.15       | 3.37        |
| Oxidized phosphatidylcholine (22:5)                                                          | 10.200                   | 600.3789                                 | 599.3223         | C <sub>30</sub> H <sub>50</sub> NO <sub>9</sub> P                              | 2.05       | 2.06        |
| Monoacylglyceride (20:4)                                                                     | 10.264                   | 379.2912                                 | 378.2770         | C <sub>23</sub> H <sub>38</sub> O <sub>4</sub>                                 | 2.06       | 19.47       |
| Oxidized ceramide (d18:0/ prostaglandin F1 alpha)                                            | 10.581                   | 656.4668                                 | 655.5387         | C <sub>38</sub> H <sub>73</sub> NO <sub>7</sub>                                | 2.54       | 9.45        |
| Oxidized phosphatidic acid (36:4)                                                            | 11.148                   | 697.4813                                 | 696.4730         | C <sub>39</sub> H <sub>69</sub> O <sub>8</sub> P                               | 3.83       | 0.45        |
| Goyaglycoside h                                                                              | 11.184                   | 815.4804                                 | 814.4715         | C <sub>42</sub> H <sub>70</sub> O <sub>15</sub>                                | 2.55       | 0.34        |
| Oxidized phosphatidic acid (39:4)                                                            | 11.690                   | 755.5204                                 | 754.5149         | C <sub>42</sub> H <sub>75</sub> O <sub>9</sub> P                               | 2.61       | 5.23        |
| Acylcarnitine (22:6)                                                                         | 11.836                   | 472.3956                                 | 471.3349         | C <sub>29</sub> H <sub>45</sub> NO <sub>4</sub>                                | 2.26       | 0.44        |
| Lysophosphatidylethanolamine (20:4)                                                          | 12.217                   | 502.2976                                 | 501.2855         | C <sub>25</sub> H <sub>44</sub> NO <sub>7</sub> P                              | 4.13       | 6.55        |
| 3-hydroxytridecanoyl carnitine                                                               | 12.332                   | 374.2856                                 | 373.2828         | C <sub>20</sub> H <sub>39</sub> NO <sub>5</sub>                                | 6.93       | 6.21        |
| Lysophosphatidylcholine (22:5)                                                               | 12.461                   | 570.4320                                 | 569.3481         | C <sub>30</sub> H <sub>52</sub> NO <sub>7</sub> P                              | 6.07       | 7.61        |
| Oxidized phosphatidylinositol (36:4)                                                         | 12.687                   | 873.5186                                 | 872.5133         | C <sub>45</sub> H <sub>76</sub> O <sub>16</sub>                                | 2.38       | 0.38        |
| Diadenosine hexaphosphate                                                                    | 13.113                   | 996.9140                                 | 995.9809         | C <sub>20</sub> H <sub>30</sub> N <sub>10</sub> O <sub>25</sub> P <sub>6</sub> | 3.24       | 0.18        |
| Phosphatidic acid (38:8)                                                                     | 13.330                   | 717.4503                                 | 716.4417         | C <sub>41</sub> H <sub>65</sub> O <sub>8</sub> P                               | 3.13       | 30.29       |
| 1,2-Dipalmitoyl-rac-glycero-3-phosphoethanolamine                                            | 13.361                   | 692.5035                                 | 691.5152         | C <sub>37</sub> H <sub>74</sub> NO <sub>8</sub> P                              | 2.37       | 0.47        |
| N-arachidonylethanolamine                                                                    | 14.048                   | 334.2970                                 | 333.3032         | C <sub>22</sub> H <sub>39</sub> NO                                             | 2.38       | 0.38        |
| Oxidized phosphatidic acid (40:2)                                                            | 14.316                   | 789.5606                                 | 788.5567         | C <sub>43</sub> H <sub>81</sub> O <sub>10</sub> P                              | 4.18       | 3.50        |
| Lysophosphatidylcholine (24:0)                                                               | 14.317                   | 608.4482                                 | 607.4577         | C <sub>32</sub> H <sub>66</sub> NO <sub>7</sub> P                              | 3.14       | 2.14        |
| Diacylglycerol (prostaglandin J2/10:0)                                                       | 14.461                   | 563.3740                                 | 562.3870         | C <sub>33</sub> H <sub>54</sub> O <sub>7</sub>                                 | 8.85       | 10.45       |
| Oxidized phosphatidylinositol (prostaglandin J2/22:3)                                        | 14.524                   | 981.5739                                 | 980.5626         | C <sub>52</sub> H <sub>85</sub> O <sub>15</sub> P                              | 4.12       | 0.26        |
| Pyrohyperforin                                                                               | 14.554                   | 535.3775                                 | 534.3709         | C <sub>35</sub> H <sub>50</sub> O <sub>4</sub>                                 | 3.36       | 0.41        |
| Cholylmethionine                                                                             | 14.557                   | 540.3362                                 | 539.3281         | C <sub>29</sub> H <sub>49</sub> NO <sub>6</sub> S                              | 15.39      | 2.16        |
| Oxidized phosphoglycerophosphate (33:1)                                                      | 14.683                   | 969.6252                                 | 968.6119         | C <sub>49</sub> H <sub>94</sub> O <sub>14</sub> P <sub>2</sub>                 | 4.08       | 0.26        |
| Oxidized phosphatidylcholine (44:7)                                                          | 14.691                   | 920.6500                                 | 919.6302         | C <sub>52</sub> H <sub>90</sub> NO <sub>10</sub> P                             | 2.59       | 2.25        |
| Phosphatidylethanolamine (36:3)                                                              | 15.095                   | 726.5429                                 | 725.5359         | C <sub>41</sub> H <sub>76</sub> NO <sub>7</sub> P                              | 2.92       | 10.71       |
| 3b,18b-3-Methoxy-11-oxo-12-oleanen-30-oic acid                                               | 15.173                   | 485.3616                                 | 484.3553         | C <sub>31</sub> H <sub>48</sub> O <sub>4</sub>                                 | 2.20       | 0.45        |
| Oxidized ceramide (d16:1/6-keto prostaglandin F1 alpha)                                      | 15.290                   | 624.4595                                 | 623.4761         | C <sub>36</sub> H <sub>65</sub> NO <sub>7</sub>                                | 2.61       | 2.36        |
| Oxidized phosphatidic acid (28:4)                                                            | 15.295                   | 601.3864                                 | 600.3427         | C <sub>31</sub> H <sub>53</sub> O <sub>9</sub> P                               | 2.25       | 0.38        |
| N-Nervonoyl Alanine                                                                          | 15.861                   | 438.3590                                 | 437.3869         | C <sub>27</sub> H <sub>51</sub> NO <sub>3</sub>                                | 2.06       | 0.38        |
| Oxidized phosphatidylcholine (35:4)                                                          | 15.924                   | 800.5443                                 | 799.5363         | C <sub>43</sub> H <sub>78</sub> NO <sub>10</sub> P                             | 2.06       | 0.34        |
| Phosphatidylinositol (36:3)                                                                  | 16.016                   | 861.5591                                 | 860.5415         | C <sub>45</sub> H <sub>81</sub> O <sub>13</sub> P                              | 4.38       | 3.58        |
| N-[(Z)-1,3-Dihydroxyoctadec-4-en-2-yl]-6-[(4-nitro-2,1,3-benzoxadiazol-7-yl)amino]hexanamide | 16.114                   | 576.3649                                 | 575.3683         | C <sub>30</sub> H <sub>49</sub> N <sub>5</sub> O <sub>6</sub>                  | 3.43       | 2.78        |

|                                           |        |                               |          |                                                                 |      |       |
|-------------------------------------------|--------|-------------------------------|----------|-----------------------------------------------------------------|------|-------|
| Oxidized phosphatidylglycerol (36:1)      | 16.128 | 809.5538                      | 808.5466 | C <sub>42</sub> H <sub>81</sub> O <sub>12</sub> P               | 3.39 | 0.20  |
| Diacylglycerol (37:5)                     | 16.262 | 677.4811                      | 676.4914 | C <sub>40</sub> H <sub>68</sub> O <sub>8</sub>                  | 2.23 | 0.34  |
| Dimethylphosphatidylethanolamine (40:8)   | 16.332 | 816.5502                      | 815.5465 | C <sub>47</sub> H <sub>78</sub> NO <sub>8</sub> P               | 3.18 | 0.24  |
| Oxidized phosphatidylcholine (37:5)       | 16.342 | 808.5494                      | 807.5414 | C <sub>45</sub> H <sub>78</sub> NO <sub>9</sub> P               | 3.92 | 0.29  |
| Lysophosphatidylcholine (22:1)            | 16.440 | 578.3948                      | 577.4107 | C <sub>30</sub> H <sub>60</sub> NO <sub>7</sub> P               | 2.78 | 0.37  |
| Oxidized phosphatidylcholine (33:3)       | 16.614 | 758.5391                      | 757.5258 | C <sub>41</sub> H <sub>76</sub> NO <sub>9</sub> P               | 4.06 | 0.43  |
| Phosphatidylcholine (38:8)                | 17.009 | 802.5042                      | 801.5309 | C <sub>46</sub> H <sub>76</sub> NO <sub>8</sub> P               | 4.12 | 26.15 |
| Sphingosylphosphorylcholine               | 17.172 | 992.6939                      | 464.3379 | C <sub>23</sub> H <sub>49</sub> N <sub>2</sub> O <sub>5</sub> P | 3.92 | 0.26  |
|                                           |        | [2M+ACN+<br>Na] <sup>2+</sup> |          |                                                                 |      |       |
| Phosphatidylethanolamine (31:0)           | 17.306 | 678.5294                      | 677.4996 | C <sub>36</sub> H <sub>72</sub> NO <sub>8</sub> P               | 2.59 | 0.17  |
| Oxidized phosphatidylethanolamine (42:10) | 17.660 | 828.5228                      | 827.5101 | C <sub>47</sub> H <sub>74</sub> NO <sub>9</sub> P               | 2.08 | 0.44  |
| Oxidized phosphatidylserine (24:3)        | 18.043 | 666.3442                      | 665.3167 | C <sub>30</sub> H <sub>52</sub> NO <sub>13</sub> P              | 7.01 | 2.26  |
| N-Cyclopropyl-trans-2-cis-6-nonadienamide | 18.290 | 194.1452                      | 193.1467 | C <sub>12</sub> H <sub>19</sub> NO                              | 3.40 | 0.25  |
| Phosphatidylethanolamine (34:1)           | 18.946 | 718.5366                      | 717.5309 | C <sub>39</sub> H <sub>76</sub> NO <sub>8</sub> P               | 2.32 | 5.86  |
| Oxidized phosphatidic acid (34:1)         | 19.112 | 673.4774                      | 672.4730 | C <sub>37</sub> H <sub>69</sub> O <sub>8</sub> P                | 2.68 | 4.62  |
| Oxidized phosphatidylcholine (35:3)       | 19.942 | 786.5739                      | 785.5571 | C <sub>43</sub> H <sub>80</sub> NO <sub>9</sub> P               | 2.17 | 0.37  |

**Supplementary Table 5.** Metabolites changed significantly between day 90 and day 0 in FO group.

| Metabolite                                                                                   | Retention time (rt, min) | Experimental $m/z$ ([M+H] <sup>+</sup> ) | Calculated $m/z$ | Molecular Formula                                                              | VIP scores | Fold change |
|----------------------------------------------------------------------------------------------|--------------------------|------------------------------------------|------------------|--------------------------------------------------------------------------------|------------|-------------|
| (5R,6Z,8E,10E,14Z)-5,20,20-trihydroxy-12-oxoicosa-6,8,10,14-tetraenoic acid                  | 0.603                    | 367.1903                                 | 366.2042         | C <sub>20</sub> H <sub>30</sub> O <sub>6</sub>                                 | 2.21       | 0.43        |
| Zucchini factor B                                                                            | 4.331                    | 664.3977                                 | 663.4288         | C <sub>44</sub> H <sub>57</sub> NO <sub>4</sub>                                | 2.14       | 0.40        |
| 9-[(3,7-Dimethyl-2,6-octadienyl)oxy]-7H-furo[3,2-g][1]benzopyran-7-one                       | 4.473                    | 339.1580                                 | 338.1518         | C <sub>21</sub> H <sub>22</sub> O <sub>4</sub>                                 | 2.15       | 0.44        |
| Oxidized phosphatidylglycerol (prostaglandin J2/i-12:0)                                      | 4.689                    | 745.3942                                 | 744.4214         | C <sub>38</sub> H <sub>65</sub> O <sub>12</sub> P                              | 3.02       | 2.87        |
| Estrone glucuronide                                                                          | 4.941                    | 447.2189                                 | 446.1941         | C <sub>24</sub> H <sub>30</sub> O <sub>8</sub>                                 | 2.83       | 3.08        |
| Moguisteine                                                                                  | 5.280                    | 340.1198                                 | 339.1140         | C <sub>16</sub> H <sub>21</sub> NO <sub>5</sub> S                              | 3.14       | 0.45        |
| p-Hydroxyphenylethylbiguanide                                                                | 5.799                    | 222.1369                                 | 221.1277         | C <sub>10</sub> H <sub>15</sub> N <sub>5</sub> O                               | 4.60       | 0.13        |
| Homocholic acid                                                                              | 6.916                    | 423.3501                                 | 422.3032         | C <sub>25</sub> H <sub>42</sub> O <sub>5</sub>                                 | 7.09       | 3.69        |
| 3b-Hydroxy-17-(1h-1,2,3-triazol-1-yl)androsta-5,16-diene                                     | 6.987                    | 340.2418                                 | 339.2311         | C <sub>21</sub> H <sub>29</sub> N <sub>3</sub> O                               | 3.55       | 0.42        |
| Cholyhistidine                                                                               | 10.085                   | 546.3325                                 | 545.3465         | C <sub>30</sub> H <sub>47</sub> N <sub>3</sub> O <sub>6</sub>                  | 2.05       | 3.00        |
| Monoacylglyceride (20:4)                                                                     | 10.264                   | 379.2912                                 | 378.2770         | C <sub>23</sub> H <sub>38</sub> O <sub>4</sub>                                 | 2.18       | 18.43       |
| Cochliobolin A                                                                               | 10.265                   | 401.2723                                 | 400.2614         | C <sub>25</sub> H <sub>36</sub> O <sub>4</sub>                                 | 2.18       | 3.94        |
| Oxidized ceramide (d18:0/ prostaglandin F1 alpha)                                            | 10.581                   | 656.4668                                 | 655.5387         | C <sub>38</sub> H <sub>73</sub> NO <sub>7</sub>                                | 2.48       | 8.87        |
| Oxidized phosphatidylethanolamine (16:0)                                                     | 10.935                   | 790.5222                                 | 789.5156         | C <sub>41</sub> H <sub>76</sub> NO <sub>11</sub> P                             | 3.39       | 16.50       |
| Goyaglycoside h                                                                              | 11.184                   | 815.4804                                 | 814.4715         | C <sub>42</sub> H <sub>70</sub> O <sub>15</sub>                                | 2.44       | 0.30        |
| Oxidized phosphatidic acid (39:4)                                                            | 11.690                   | 755.5204                                 | 754.5149         | C <sub>42</sub> H <sub>75</sub> O <sub>9</sub> P                               | 2.44       | 4.35        |
| Lysophosphatidylethanolamine (20:4)                                                          | 12.217                   | 502.2976                                 | 501.2855         | C <sub>25</sub> H <sub>44</sub> NO <sub>7</sub> P                              | 4.27       | 5.44        |
| 3-hydroxytridecanoyl carnitine                                                               | 12.332                   | 374.2856                                 | 373.2828         | C <sub>20</sub> H <sub>39</sub> NO <sub>5</sub>                                | 6.83       | 6.12        |
| Lysophosphatidylcholine (22:5)                                                               | 12.461                   | 570.4320                                 | 569.3481         | C <sub>30</sub> H <sub>52</sub> NO <sub>7</sub> P                              | 5.74       | 5.30        |
| Oxidized phosphatidylinositol (36:4)                                                         | 12.687                   | 873.5186                                 | 872.5133         | C <sub>45</sub> H <sub>76</sub> O <sub>16</sub>                                | 2.04       | 0.45        |
| Diadenosine hexaphosphate                                                                    | 13.113                   | 996.9140                                 | 995.9809         | C <sub>20</sub> H <sub>30</sub> N <sub>10</sub> O <sub>25</sub> P <sub>6</sub> | 3.24       | 0.18        |
| Phosphatidic acid (38:8)                                                                     | 13.330                   | 717.4503                                 | 716.4417         | C <sub>41</sub> H <sub>65</sub> O <sub>8</sub> P                               | 3.31       | 14.50       |
| Oxidized phosphatidylethanolamine (38:5)                                                     | 14.032                   | 780.5176                                 | 779.5101         | C <sub>43</sub> H <sub>74</sub> NO <sub>9</sub> P                              | 2.38       | 0.49        |
| N-arachidonylethanolamine                                                                    | 14.048                   | 334.2970                                 | 333.3032         | C <sub>22</sub> H <sub>39</sub> NO                                             | 2.00       | 0.46        |
| Oxidized phosphatidic acid (40:2)                                                            | 14.316                   | 789.5606                                 | 788.5567         | C <sub>43</sub> H <sub>81</sub> O <sub>10</sub> P                              | 3.61       | 2.88        |
| Diacylglycerol (prostaglandin J2/10:0)                                                       | 14.461                   | 563.3740                                 | 562.3870         | C <sub>33</sub> H <sub>54</sub> O <sub>7</sub>                                 | 10.41      | 11.57       |
| Oxidized phosphatidylinositol (prostaglandin J2/22:3)                                        | 14.524                   | 981.5739                                 | 980.5626         | C <sub>52</sub> H <sub>85</sub> O <sub>15</sub> P                              | 4.76       | 0.17        |
| Pyrohyperforin                                                                               | 14.554                   | 535.3775                                 | 534.3709         | C <sub>35</sub> H <sub>50</sub> O <sub>4</sub>                                 | 3.08       | 0.41        |
| Cholylmethionine                                                                             | 14.557                   | 540.3362                                 | 539.3281         | C <sub>29</sub> H <sub>49</sub> NO <sub>6</sub> S                              | 17.59      | 2.94        |
| Oxidized phosphoglycerophosphate (33:1)                                                      | 14.683                   | 969.6252                                 | 968.6119         | C <sub>49</sub> H <sub>94</sub> O <sub>14</sub> P <sub>2</sub>                 | 4.92       | 0.15        |
| Oxidized phosphatidylcholine (44:7)                                                          | 14.691                   | 920.6500                                 | 919.6302         | C <sub>52</sub> H <sub>90</sub> NO <sub>10</sub> P                             | 2.59       | 2.25        |
| Oxidized phosphatidylethanolamine (40:7)                                                     | 14.771                   | 804.5190                                 | 803.5101         | C <sub>45</sub> H <sub>74</sub> NO <sub>9</sub> P                              | 3.80       | 2.95        |
| Phosphatidic acid (38:3)                                                                     | 14.886                   | 727.5219                                 | 726.5200         | C <sub>41</sub> H <sub>75</sub> O <sub>8</sub> P                               | 5.59       | 3.12        |
| Phosphatidylethanolamine (36:2)                                                              | 14.937                   | 728.5610                                 | 727.5516         | C <sub>41</sub> H <sub>78</sub> NO <sub>7</sub> P                              | 4.53       | 2.96        |
| Phosphatidylethanolamine (36:3)                                                              | 15.095                   | 726.5429                                 | 725.5359         | C <sub>41</sub> H <sub>76</sub> NO <sub>7</sub> P                              | 3.49       | 17.55       |
| Lysophosphatidylethanolamine (22:0)                                                          | 15.156                   | 538.3743                                 | 537.3794         | C <sub>27</sub> H <sub>56</sub> NO <sub>7</sub> P                              | 2.07       | 2.88        |
| Alpha-Tocopherol phosphate                                                                   | 15.227                   | 511.3757                                 | 510.3474         | C <sub>29</sub> H <sub>51</sub> O <sub>5</sub> P                               | 2.09       | 0.50        |
| Oxidized ceramide (d16:1/6-keto prostaglandin F1 alpha)                                      | 15.290                   | 624.4595                                 | 623.4761         | C <sub>36</sub> H <sub>65</sub> NO <sub>7</sub>                                | 2.49       | 2.49        |
| 12-[Methyl-(4-nitro-2,1,3-benzoxadiazol-7-yl)amino]octadecanoic acid                         | 15.393                   | 477.2985                                 | 476.2999         | C <sub>25</sub> H <sub>40</sub> N <sub>4</sub> O <sub>5</sub>                  | 3.48       | 2.02        |
| Phosphatidylinositol (36:3)                                                                  | 16.016                   | 861.5591                                 | 860.5415         | C <sub>45</sub> H <sub>81</sub> O <sub>13</sub> P                              | 4.65       | 6.86        |
| N-[(Z)-1,3-Dihydroxyoctadec-4-en-2-yl]-6-[(4-nitro-2,1,3-benzoxadiazol-7-yl)amino]hexanamide | 16.114                   | 576.3649                                 | 575.3683         | C <sub>30</sub> H <sub>49</sub> N <sub>5</sub> O <sub>6</sub>                  | 3.19       | 2.32        |
| Diacylglycerol (37:5)                                                                        | 16.262                   | 677.4811                                 | 676.4914         | C <sub>40</sub> H <sub>68</sub> O <sub>8</sub>                                 | 2.11       | 0.32        |
| Dimethylphosphatidylethanolamine (40:8)                                                      | 16.332                   | 816.5502                                 | 815.5465         | C <sub>47</sub> H <sub>78</sub> NO <sub>8</sub> P                              | 3.09       | 0.20        |
| Oxidized phosphatidylcholine (37:5)                                                          | 16.342                   | 808.5494                                 | 807.5414         | C <sub>45</sub> H <sub>78</sub> NO <sub>9</sub> P                              | 3.68       | 0.27        |

|                                           |        |                           |          |                                                                 |       |       |
|-------------------------------------------|--------|---------------------------|----------|-----------------------------------------------------------------|-------|-------|
| Lysophosphatidylcholine (22:1)            | 16.440 | 578.3948                  | 577.4107 | C <sub>30</sub> H <sub>60</sub> NO <sub>7</sub> P               | 2.43  | 0.39  |
| Oxidized phosphatidylcholine (33:3)       | 16.614 | 758.5391                  | 757.5258 | C <sub>41</sub> H <sub>76</sub> NO <sub>9</sub> P               | 3.69  | 0.45  |
| Phosphatidylcholine (38:8)                | 17.009 | 802.5042                  | 801.5309 | C <sub>46</sub> H <sub>76</sub> NO <sub>8</sub> P               | 3.56  | 10.22 |
| Sphingosylphosphorylcholine               | 17.172 | 992.6939                  | 464.3379 | C <sub>23</sub> H <sub>49</sub> N <sub>2</sub> O <sub>5</sub> P | 4.90  | 0.14  |
|                                           |        | [2M+ACN+Na] <sup>2+</sup> |          |                                                                 |       |       |
| Phosphatidylethanolamine (31:0)           | 17.306 | 678.5294                  | 677.4996 | C <sub>36</sub> H <sub>72</sub> NO <sub>8</sub> P               | 2.49  | 0.14  |
| Oxidized phosphatidylglycerol (36:1)      | 17.341 | 809.5573                  | 808.5466 | C <sub>42</sub> H <sub>81</sub> O <sub>12</sub> P               | 4.50  | 0.15  |
| Oxidized phosphatidylcholine (35:3)       | 17.415 | 786.5635                  | 785.5571 | C <sub>43</sub> H <sub>80</sub> NO <sub>9</sub> P               | 2.28  | 2.85  |
| Oxidized phosphatidylserine (24:3)        | 18.043 | 666.3442                  | 665.3167 | C <sub>30</sub> H <sub>52</sub> NO <sub>13</sub> P              | 10.27 | 5.41  |
| N-Cyclopropyl-trans-2-cis-6-nonadienamide | 18.290 | 194.1452                  | 193.1467 | C <sub>12</sub> H <sub>19</sub> NO                              | 4.31  | 0.14  |
| Phosphatidylethanolamine (34:1)           | 18.946 | 718.5366                  | 717.5309 | C <sub>39</sub> H <sub>76</sub> NO <sub>8</sub> P               | 2.29  | 4.84  |
| Oxidized phosphatidic acid (34:1)         | 19.112 | 673.4774                  | 672.4730 | C <sub>37</sub> H <sub>69</sub> O <sub>8</sub> P                | 2.50  | 3.82  |
| Oxidized phosphatidylcholine (35:3)       | 19.942 | 786.5739                  | 785.5571 | C <sub>43</sub> H <sub>80</sub> NO <sub>9</sub> P               | 2.00  | 0.41  |



**Supplementary Table 6.** Metabolites changed significantly between day 90 and day 0 in CO group.

| Metabolite                                                                                          | Retention time (rt, min) | Experimental $m/z$ ([M+H] <sup>+</sup> ) | Calculated $m/z$ | Molecular Formula                                  | VIP scores | Fold change |
|-----------------------------------------------------------------------------------------------------|--------------------------|------------------------------------------|------------------|----------------------------------------------------|------------|-------------|
| N-Nervonoyl Methionine                                                                              | 3.842                    | 498.3845                                 | 497.3903         | C <sub>29</sub> H <sub>55</sub> NO <sub>3</sub> S  | 2.55       | 0.48        |
| Dimethylphosphatidylethanolamine (40:8)                                                             | 4.818                    | 814.5469                                 | 813.5520         | C <sub>47</sub> H <sub>76</sub> NO <sub>8</sub> P  | 3.61       | 0.35        |
| Oxidized phosphatidylcholine (34:1)                                                                 | 4.819                    | 792.5662                                 | 791.5676         | C <sub>42</sub> H <sub>82</sub> NO <sub>10</sub> P | 4.58       | 0.50        |
| Phosphatidic acid (44:4)                                                                            | 4.821                    | 837.6189                                 | 836.6295         | C <sub>49</sub> H <sub>89</sub> O <sub>8</sub> P   | 2.29       | 0.40        |
| Lysophosphatidylcholine (14:0)                                                                      | 9.033                    | 468.2875                                 | 467.3012         | C <sub>22</sub> H <sub>46</sub> NO <sub>7</sub> P  | 2.24       | 7.17        |
| Lysophosphatidylethanolamine (22:6)                                                                 | 9.754                    | 526.2716                                 | 525.2855         | C <sub>27</sub> H <sub>44</sub> NO <sub>7</sub> P  | 2.03       | 3.35        |
| Lysophosphatidylethanolamine (20:4)                                                                 | 9.814                    | 502.2712                                 | 501.2855         | C <sub>25</sub> H <sub>44</sub> NO <sub>7</sub> P  | 2.53       | 6.35        |
| Lysophosphatidylcholine (20:4)                                                                      | 9.854                    | 544.3179                                 | 543.3325         | C <sub>28</sub> H <sub>50</sub> NO <sub>7</sub> P  | 4.19       | 2.49        |
| Cochliobolin A                                                                                      | 10.310                   | 401.2738                                 | 400.2614         | C <sub>25</sub> H <sub>36</sub> O <sub>4</sub>     | 4.23       | 3.55        |
| N-Desisopropyl Pentisomide                                                                          | 11.122                   | 278.2346                                 | 277.2154         | C <sub>16</sub> H <sub>27</sub> N <sub>3</sub> O   | 2.46       | 4.98        |
| 7-[(1S,2R,3R,4R)-3-(3-Hydroxy-4-phenylpent-1-enyl)-7-oxabicyclo[2.2.1]heptan-2-yl]hept-5-enoic acid | 11.588                   | 385.2385                                 | 384.2301         | C <sub>24</sub> H <sub>32</sub> O <sub>4</sub>     | 5.25       | 8.86        |
| C9-acylcarnitine                                                                                    | 12.050                   | 302.2321                                 | 301.2253         | C <sub>16</sub> H <sub>31</sub> NO <sub>4</sub>    | 2.89       | 5.49        |
| Oxidized phosphatidylglycerol (prostaglandin D1/12:0)                                               | 12.818                   | 765.4528                                 | 764.4476         | C <sub>38</sub> H <sub>69</sub> O <sub>13</sub> P  | 2.39       | 0.49        |
| Oxidized phosphatidylcholine (33:3)                                                                 | 14.819                   | 758.5377                                 | 757.5258         | C <sub>41</sub> H <sub>76</sub> NO <sub>9</sub> P  | 4.49       | 0.39        |
| Oxidized phosphatidylserine (32:4)                                                                  | 15.667                   | 744.3940                                 | 743.4373         | C <sub>38</sub> H <sub>66</sub> NO <sub>11</sub> P | 2.30       | 4.04        |
| N-(2R-Hydroxytricosanoyl)-2S-amino-1,3S,4R-octadecanetriol                                          | 15.921                   | 670.6140                                 | 669.6271         | C <sub>41</sub> H <sub>83</sub> NO <sub>5</sub>    | 2.31       | 0.27        |
| Oxidized phosphatidylcholine (46:7)                                                                 | 16.287                   | 948.6818                                 | 947.6615         | C <sub>54</sub> H <sub>94</sub> NO <sub>10</sub> P | 2.00       | 0.32        |
| Oxidized phosphatidylcholine (44:6)                                                                 | 16.336                   | 904.6537                                 | 903.6353         | C <sub>52</sub> H <sub>90</sub> NO <sub>9</sub> P  | 2.29       | 0.33        |
| Phosphatidylcholine (40:7)                                                                          | 16.435                   | 816.6053                                 | 815.5829         | C <sub>48</sub> H <sub>82</sub> NO <sub>7</sub> P  | 2.51       | 0.35        |
| Phosphatidylcholine (35:2)                                                                          | 16.480                   | 772.5839                                 | 771.5778         | C <sub>43</sub> H <sub>82</sub> NO <sub>8</sub> P  | 2.49       | 0.36        |
| Oxidized phosphatidylcholine (37:5)                                                                 | 17.487                   | 810.5695                                 | 809.5571         | C <sub>45</sub> H <sub>80</sub> NO <sub>9</sub> P  | 3.71       | 0.15        |
| Oxidized phosphatidylcholine (37:5)                                                                 | 17.617                   | 810.5681                                 | 809.5571         | C <sub>45</sub> H <sub>80</sub> NO <sub>9</sub> P  | 3.98       | 0.18        |
| 3-O-Sulfogalactosylceramide (d36:2)                                                                 | 17.693                   | 806.5391                                 | 805.5374         | C <sub>42</sub> H <sub>79</sub> NO <sub>11</sub> S | 3.28       | 0.24        |
| 3-O-Sulfogalactosylceramide (d34:1)                                                                 | 17.927                   | 780.5256                                 | 779.5217         | C <sub>40</sub> H <sub>77</sub> NO <sub>11</sub> S | 2.14       | 0.16        |
| Phosphatidylserine (40:10)                                                                          | 17.961                   | 828.4884                                 | 827.4737         | C <sub>46</sub> H <sub>70</sub> NO <sub>10</sub> P | 2.23       | 0.38        |
| Oxidized phosphatidylethanolamine (40:7)                                                            | 17.795                   | 806.5361                                 | 805.5258         | C <sub>45</sub> H <sub>76</sub> NO <sub>9</sub> P  | 2.42       | 0.43        |
| Oxidized phosphatidylethanolamine (38:6)                                                            | 18.004                   | 780.5208                                 | 779.5101         | C <sub>43</sub> H <sub>74</sub> NO <sub>9</sub> P  | 2.16       | 0.15        |

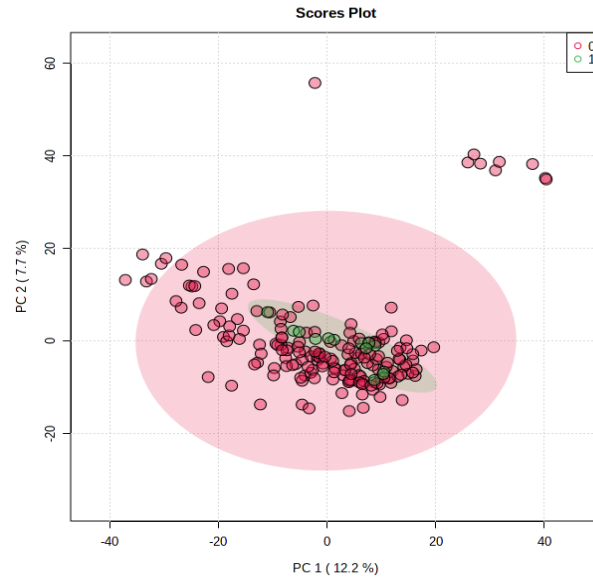

**Supplementary Figure 1.** PCA score plot of QC samples. 0 represents serum samples, 1 represents QC samples.

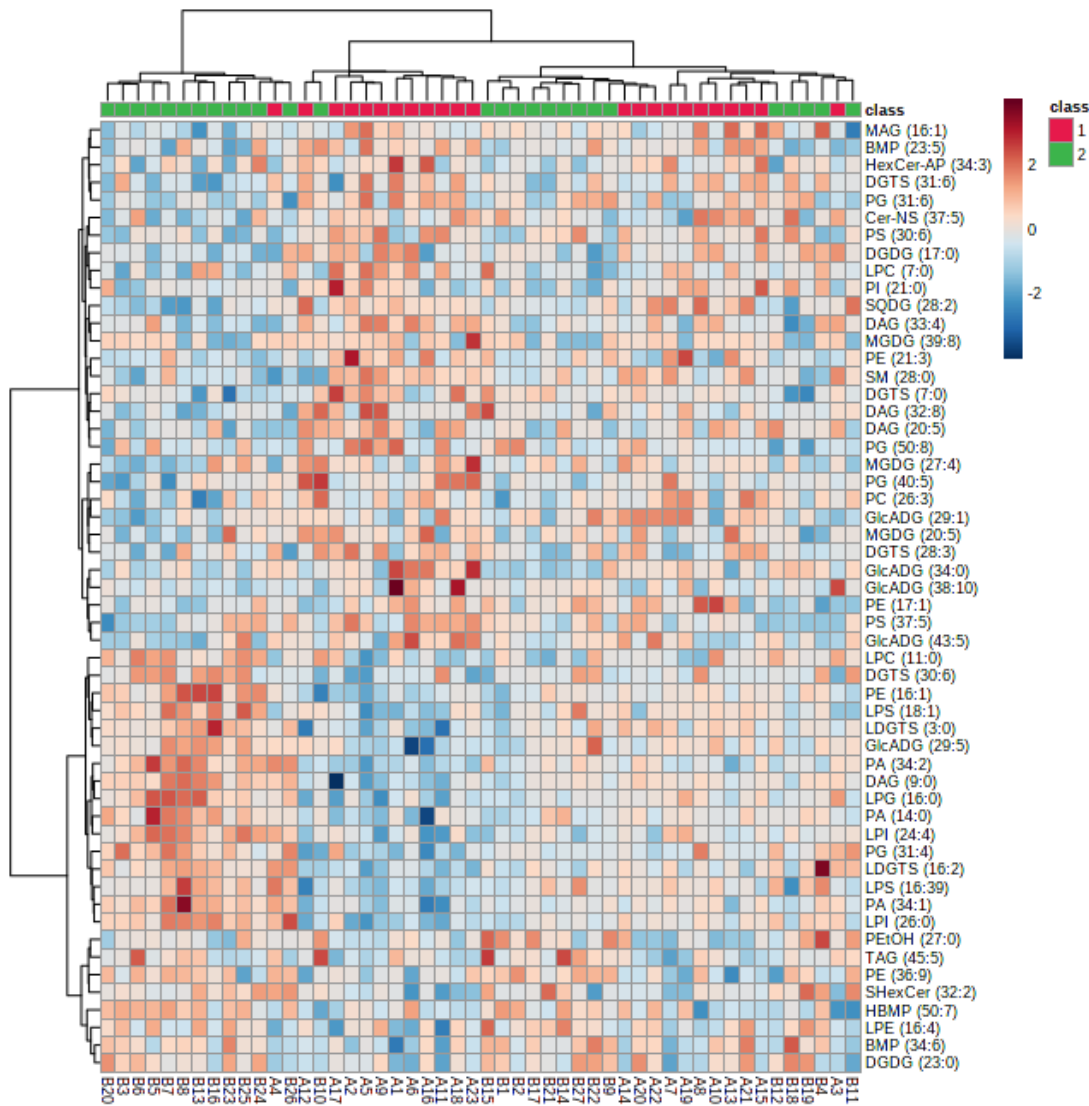

**Supplementary Figure 2.** Hierarchical clusters of significant metabolites between FO+D and FO groups, 1 represents FO+D group, 2 represents FO group.

Abbreviations: BMP, bis monoacylglycerol phosphate; Cer-NS, ceramide-non-hydroxy fatty acid/sphingosine; DAG, diacylglycerol; DGDG, digalactosyldiacylglycerol; DGTS, diacylglycerol-N-trimethylhomoserine; GlcADG, glucuronosyldiacylglycerol; HBMP, human bone morphogenetic protein; HexCer-AP, hexosylceramides-alpha-hydroxy fatty acid/phytosphingosine; LDGTS, lysodiacylglyceryltrimethyl homoserines; LPC, lysophosphatidylcholine; LPE, lysophosphatidylethanolamide; LPG, lysophosphatidylglycerol; LPI, lysophosphatidylinositol; LPS, lysophosphatidylserine; MAG, monoacylglycerol; MGDG, monogalactosyl-diacylglycerol; PA, phosphatidic acid; PC, phosphatidylcholine; PE, phosphatidylethanolamine; PEtOH, Phosphatidylethanol; PG, phosphatidylglycerol; PI, phosphatidylinositol; PS, phosphatidylserine; SHexCer, sulfatides hexosylceramide; SM, sphingomyelin; SQDG, sulfoquinovosyl-diacylglycerol; TAG, triglyceride.

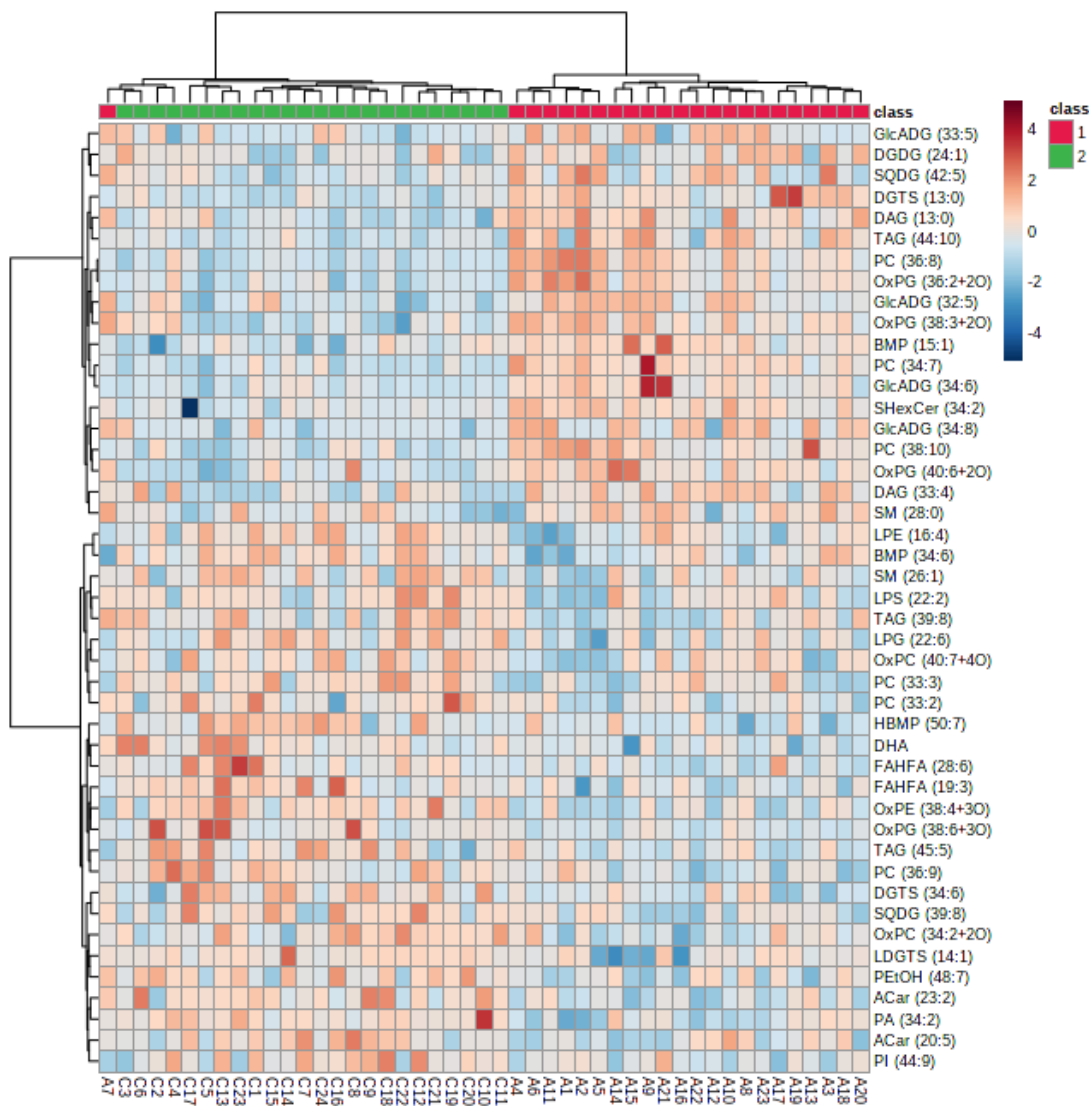

**Supplementary Figure 3.** Hierarchical clusters of significant metabolites between FO+D and CO groups, 1 represents FO+D group, 2 represents CO group.

Abbreviations: ACar, acylcarnitine; BMP, bis monoacylglycerol phosphate; DAG, diacylglycerol; DGDG, digalactosyldiacylglycerol; DGTS, diacylglycerol-N-trimethylhomoserine; DHA, docosahexaenoic acid, FAHFA, fatty acyl esters of hydroxy fatty acid; GlcADG, glucuronosyldiacylglycerol; HBMP, human bone morphogenetic protein; LDGTS, lysodiacylglyceryltrimethyl homoserines; LPE, lysophosphatidylethanolamide; LPG, lysophosphatidylglycerol; LPS, lysophosphatidylserine; OxPC, oxidized phosphatidylcholine; OxPE, oxidized phosphatidylethanolamine; OxPG, oxidized phosphatidylglycerol; PA, phosphatidic acid; PC, phosphatidylcholine; PEtOH, Phosphatidylethanol; PI, phosphatidylinositol; SHexCer, sulfatides hexosylceramide; SM, sphingomyelin; SQDG, sulfoquinovosyl-diacylglycerol; TAG, triglyceride.

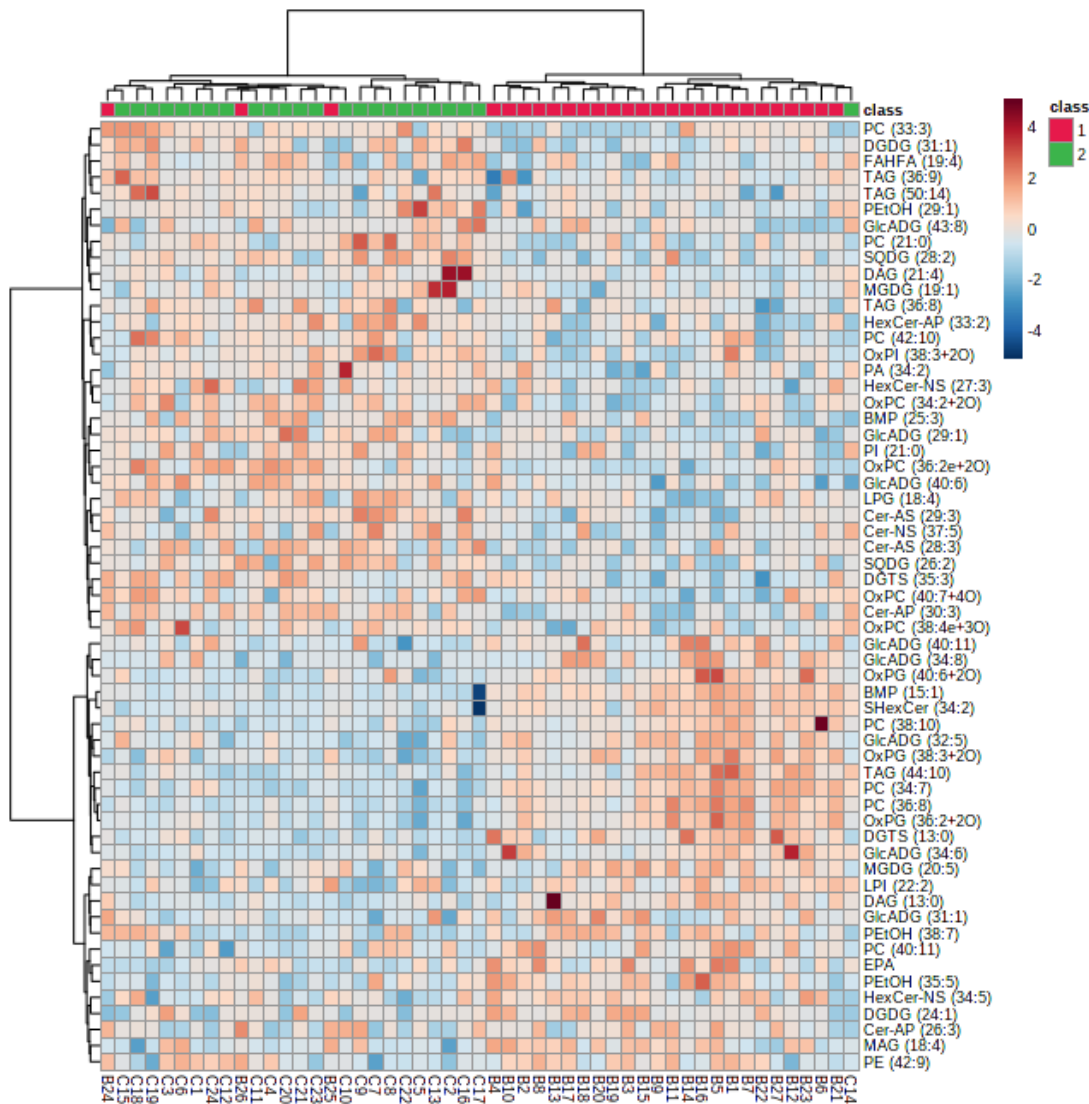

**Supplementary Figure 4.** Hierarchical clusters of significant metabolites between FO and CO groups, 1 represents FO group, 2 represents CO group.

Abbreviations: BMP, bis monoacylglycerol phosphate; Cer-AP, ceramide-alpha-hydroxy fatty acid/phytosphingosine; Cer-AS, ceramide-alpha-hydroxy fatty acid/sphingosine; Cer-NS, ceramide-non-hydroxy fatty acid/sphingosine; DAG, diacylglycerol; DGDG, digalactosyldiacylglycerol; DGTS, diacylglycerol-N-trimethylhomoserine; EPA, eicosapentaenoic acid; FAHFA, fatty acyl esters of hydroxy fatty acid; GlcADG, glucuronosyldiacylglycerol; HexCer-AP, hexosylceramides-alpha-hydroxy fatty acid/phytosphingosine; HexCer-NS, hexosylceramides-non-hydroxy fatty acid/sphingosine; LPG, lysophosphatidylglycerol; LPI, lysophosphatidylinosito; MAG, monoacylglycerol; MGDG, monogalactosyl-diacylglycerol; OxPC, oxidized phosphatidylcholine; OxPG, oxidized phosphatidylglycerol; OxPI, oxidized phosphatidylinositol; PA, phosphatidic acid; PC, phosphatidylcholine; PE, phosphatidylethanolamine; PEtOH, Phosphatidylethanol; PI, phosphatidylinositol; SHexCer, sulfatides hexosylceramide; SQDG, sulfoquinovosyl-diacylglycerol; TAG, triglyceride.

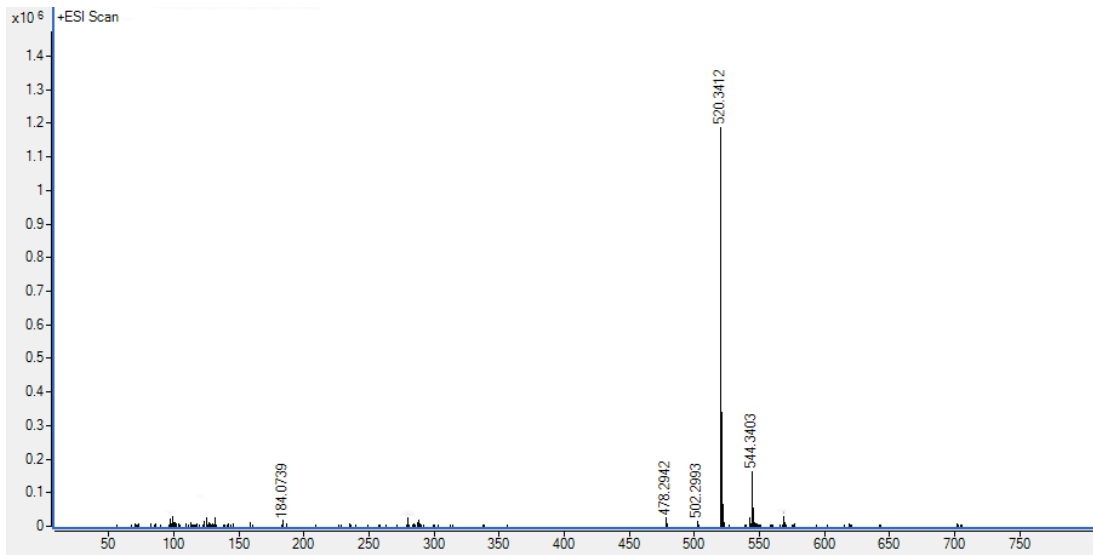

**Supplementary Figure 5.** Targeted LC-MS/MS spectrometry of PC (38:7) in [M+H]<sup>+</sup> mode.

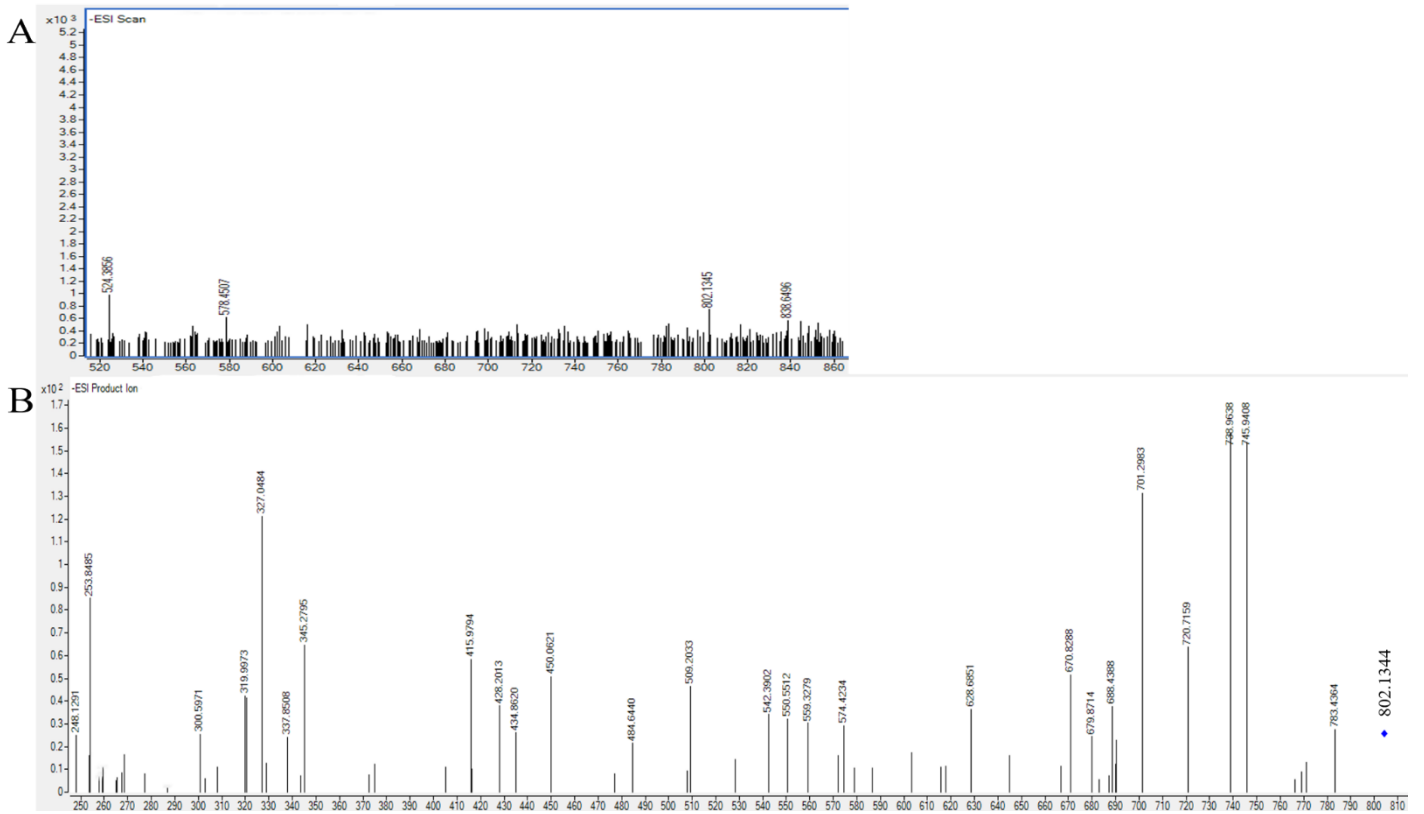

**Supplementary Figure 6.** Mass spectrogram (A) of PC (38:7) and targeted LC-MS/MS spectrometry of PC (16:1/22:6) (B) in [M-H]<sup>-</sup> mode.
